# Supplementary material for: Facile fabrication of NiCo-LDH on activated rice husk carbon for high-performance all-solid-state asymmetric supercapacitors
Source: Royal Society of Chemistry journal article supplement (doi:10.1039/d3nj02592f), 2023-01-01
Supplement: d3nj02592f1.pdf [file d3nj02592f1.pdf]

## Supporting Information

### **Facile fabrication of NiCo-LDH on activated rice husk carbon for high-performance all-solid-state asymmetric supercapacitors**

Hexiang Hu<sup>a</sup>, Kaidi Li<sup>a</sup>, Xuesong Li<sup>a</sup>, Liying Wang<sup>a</sup>, Xijia Yang<sup>a\*</sup>, and Qixian Zhang<sup>b,c,d\*</sup>

<sup>a</sup> Key Laboratory of Advanced Structural Materials, Ministry of Education & Advanced Institute of Materials Science, Changchun University of Technology, Changchun 130012, People's Republic of China

<sup>b</sup> School of Materials Science and Engineering, Shanghai University, Shanghai 200436, PR China

<sup>c</sup> Shaoxing Institute of Technology, Shanghai University, Shaoxing 312000, PR China

<sup>d</sup> Zhejiang Institute of Advanced Materials, Shanghai University, Jiashan 314113, PR China

E-mail: yangxijia@ccut.edu.cn; qxzhang@ciac.ac.cn

Fax: +86-0431-85716426; Tel: +86-0431-85716421

\* To whom all correspondence should be addressed.

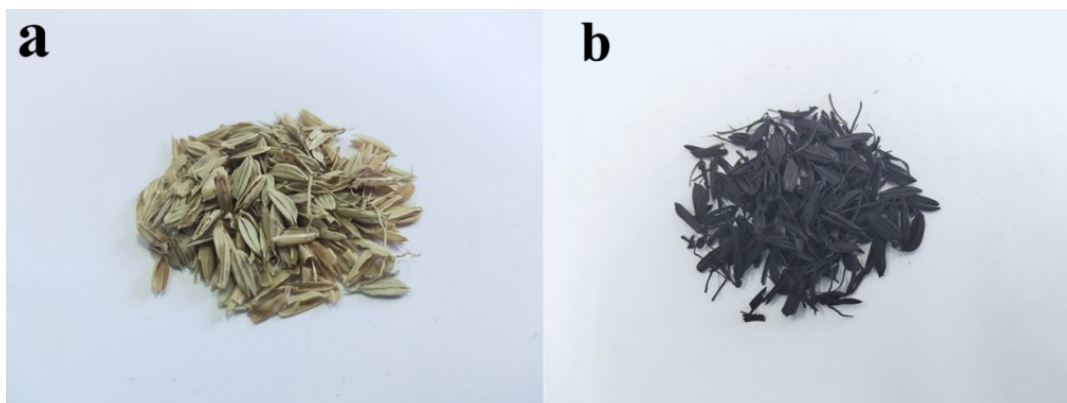

Fig. S1. Photographs of RHC electrode material: (a) before carbonization; (b) after carbonization.

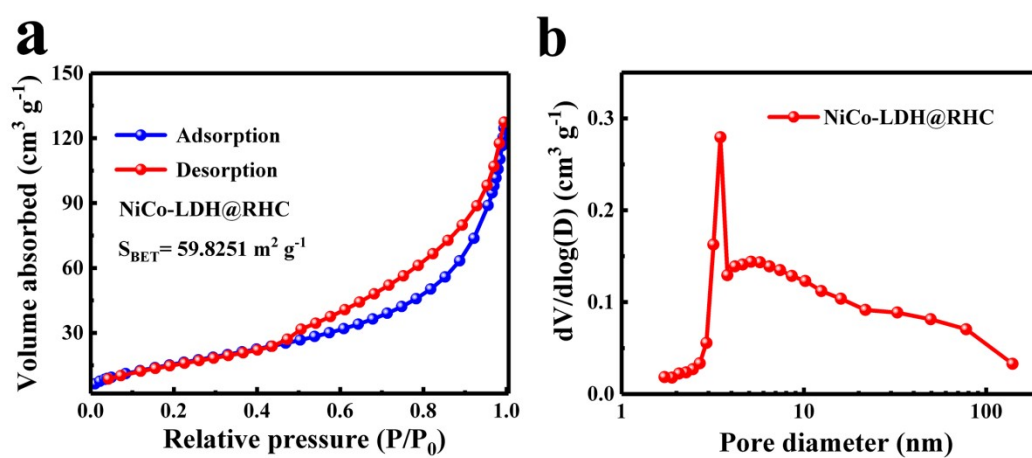

Fig. S2. (a) Nitrogen adsorption and desorption isotherms of NiCo-LDH@RHC; (b) the corresponding pore size distribution plots.

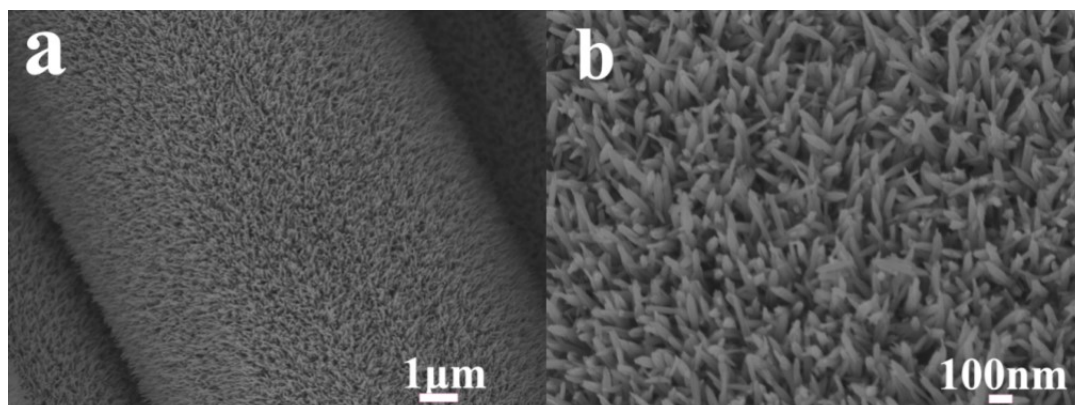

Fig. S3. SEM images of the Fe<sub>2</sub>O<sub>3</sub>/CC anode material at different magnifications.

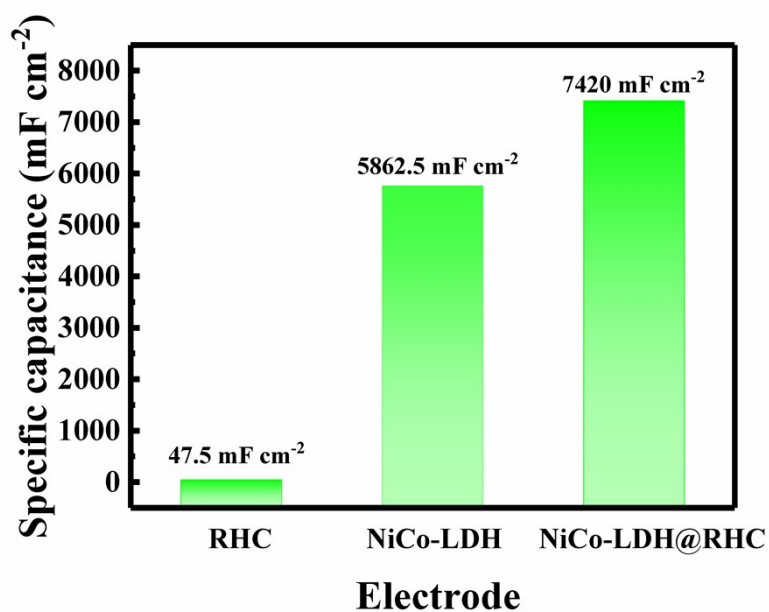

Fig. S4. Specific capacitance of RHC, NiCo-LDH and NiCo-LDH@RHC on NF at 5 mA cm<sup>-2</sup>.

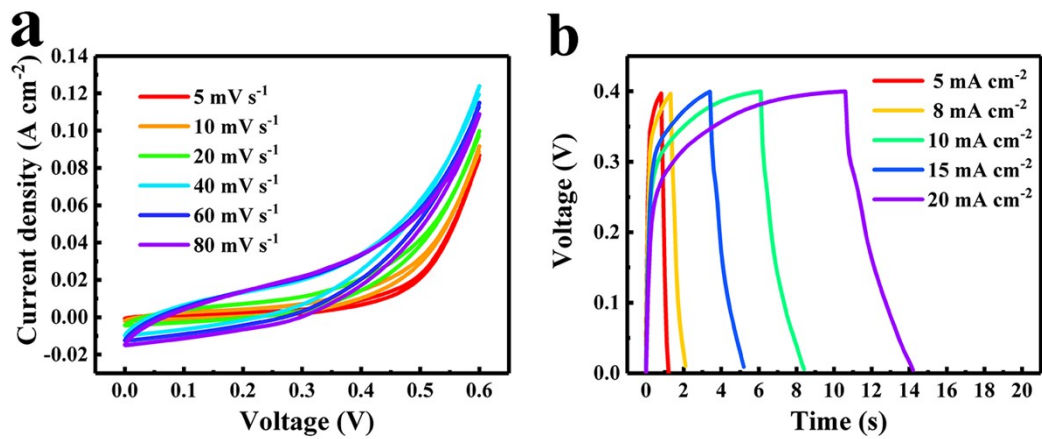

Fig. S5. (a) CV and (b) GCD curves of RHC.

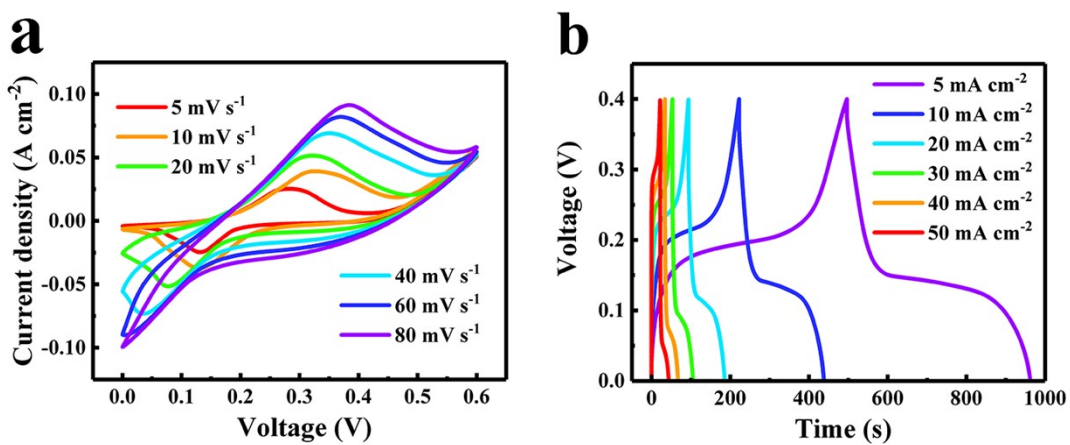

Fig. S6. (a) CV and (b) GCD curves of NiCo-LDH.

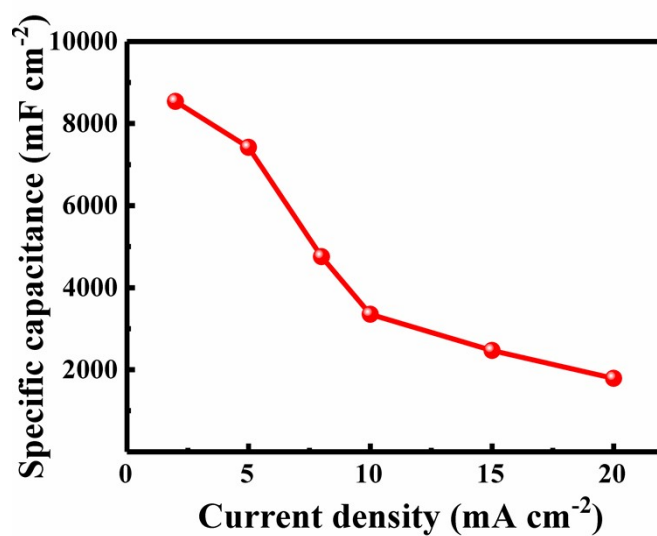

Fig. S7. Specific capacitance of NiCo-LDH@RHC on NF at different current densities.

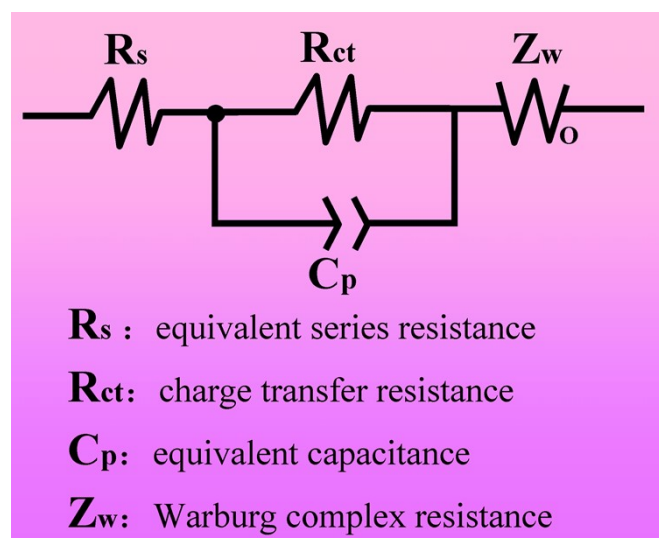

Fig. S8. Equivalent circuit diagram for fitting the EIS curve.

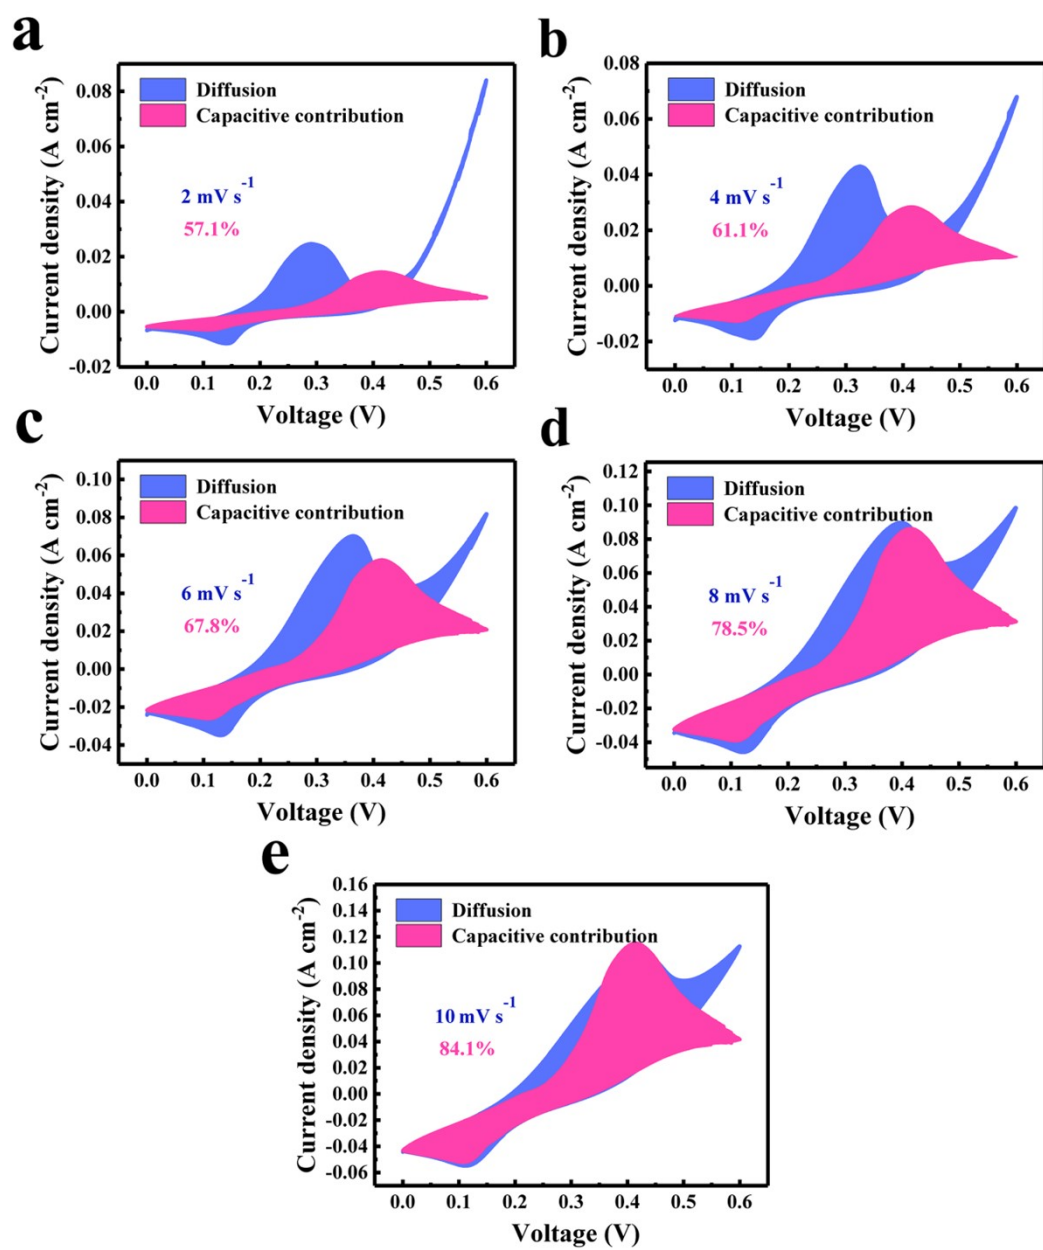

Fig. S9. The capacitive contribution of NiCo-LDH@RHC at different scan speeds: (a) 2 mVs<sup>-1</sup>; (b) 4 mV s<sup>-1</sup>; (c) 6 mV s<sup>-1</sup>; (d) 8 mV s<sup>-1</sup>; (e) 10 mV s<sup>-1</sup>.

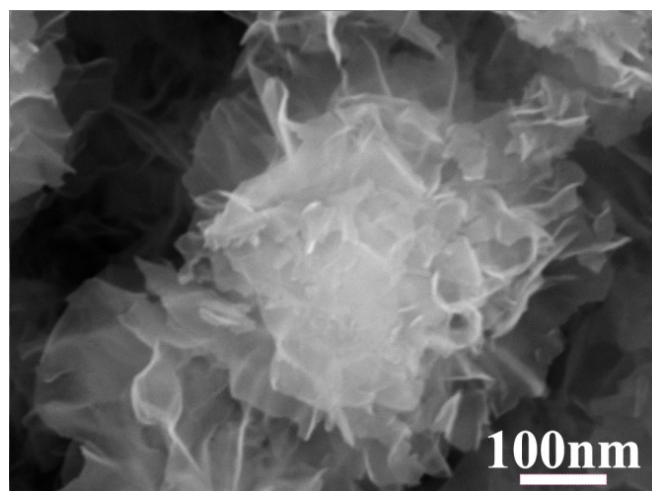

Fig. S10. SEM image of NiCo-LDH@RHC on NF after 5000 cycles.

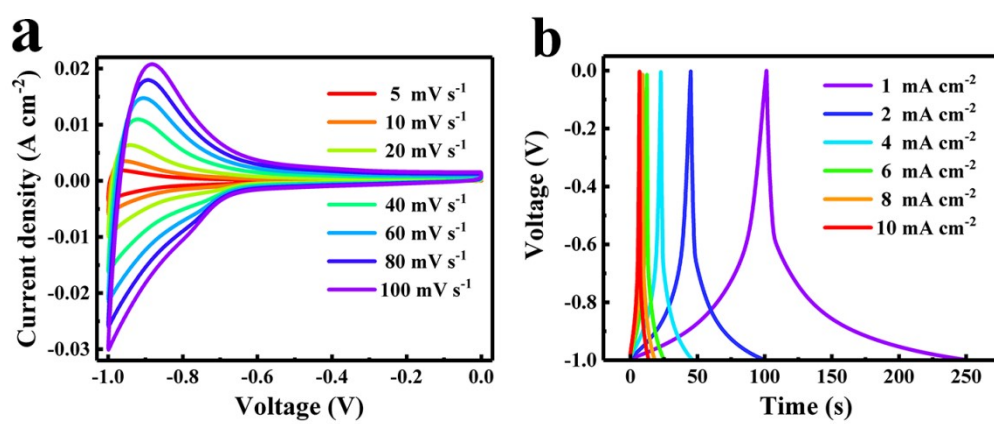

Fig. S11. Fe<sub>2</sub>O<sub>3</sub> anode: (a) CV curves at varying scan rates in the potential window of -1.0 - 0.0 V; (b) GCD curves at varying current densities in the potential window of -1.0 - 0.0 V.

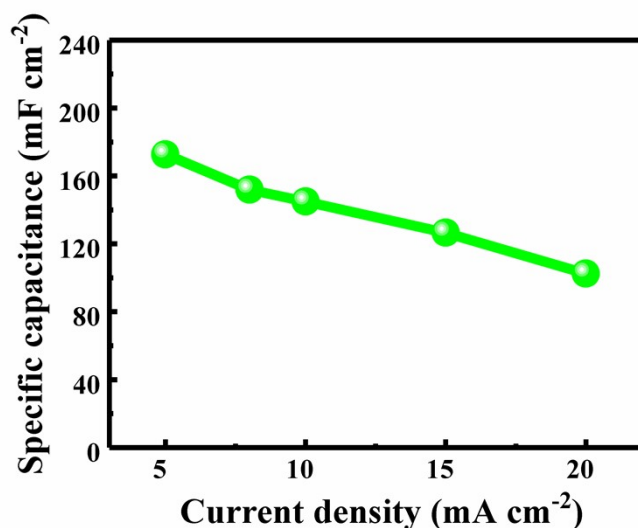

Fig. S12. The rate capability of the all-solid-state ASC

Table S1. Comparison of the Cs for the electrodes with the similar active materials to our work.

| Electrode                                                 | Electrolyte | Current density (mA cm <sup>-2</sup> ) | Capacitance (mF cm <sup>-2</sup> ) | Ref.      |
|-----------------------------------------------------------|-------------|----------------------------------------|------------------------------------|-----------|
| NiCo <sub>2</sub> O <sub>4</sub> @Ni(OH) <sub>2</sub> /NF | 1M KOH      | 1                                      | 3500                               | [S1]      |
| Ni <sub>3</sub> S <sub>2</sub> @Ni(OH) <sub>2</sub> /NF   | 6M KOH      | 1                                      | 3550                               | [S2]      |
| NiCo <sub>2</sub> O <sub>4</sub> @MnO <sub>2</sub> /CC    | 2M KOH      | 2                                      | 3810                               | [S3]      |
| NiCo <sub>2</sub> O <sub>4</sub> @MnMoO <sub>4</sub> /NF  | 3M KOH      | 2                                      | 4240.5                             | [S4]      |
| Ni(OH) <sub>2</sub> @CoMoO <sub>4</sub> /NF               | 2M NaOH     | 8                                      | 5230                               | [S5]      |
| NiCo <sub>2</sub> O <sub>4</sub> @NiCo-LDH/ACC            | 6M KOH      | 2                                      | 6090                               | [S6]      |
| NiCo-LDH@RHC/NF                                           | 3M KOH      | 2                                      | 8542.5                             | This work |



Table S2. Performance comparison of our ASC with other ASCs with the similar active materials.

| Materials                                        | Energy density ( $\mu\text{Wh cm}^{-2}$ ) | Power density ( $\text{mW cm}^{-2}$ ) | Ref.      |
|--------------------------------------------------|-------------------------------------------|---------------------------------------|-----------|
| NiCo <sub>2</sub> O <sub>4</sub> NG/CF//C        | 9.46                                      | 0.608                                 | [S7]      |
| NiO/Ni(OH) <sub>2</sub> /PEDOT//C                | 11                                        | 0.33                                  | [S8]      |
| MnO <sub>2</sub> /CNT//MnO <sub>2</sub> /CNT     | 18                                        | 0.72                                  | [S9]      |
| NiCo-LDH@RHC/ NF//Fe <sub>2</sub> O <sub>3</sub> | 61.44                                     | 3.99                                  | This work |

## References

- [S1] Y. Fan, S. Liu, X. Han, R. Xiang, Y. Gong, T. Wang, Y. Jing, S. Maruyama, Q. Zhang, Y. J. A. A. E. M. Zhao, *ACS Applied Energy Materials*, 2020, **3**, 7580-7587.
- [S2] J. Lin, X. Zheng, Y. Wang, H. Liang, H. Jia, S. Chen, J. Qi, J. Cao, W. Fei, J. Feng, *Inorganic Chemistry Frontiers*, 2018, **5**, 1985-1991.
- [S3] J. Zhang, Y. Wang, C. Yu, T. Zhu, Y. Li, J. Cui, J. Wu, X. Shu, Y. Qin, J. Sun, J. Yan, Y. Zhang, Y. Wu, *Journal of Materials Science*, 2019, **55**, 688-700.
- [S4] Y. Yuan, W. Wang, J. Yang, H. Tang, Z. Ye, Y. Zeng, J. Lu, *Langmuir*, 2017, **33**, 10446-10454.
- [S5] X. Li, S.-Y. Lin, M. Zhang, G. Jiang, H. Gao, *Nano*, 2016, **11**.
- [S6] S. Li, Y. Luo, C. Wang, M. Wu, Y. Xue, J. Yang, L. Li, *Journal of Alloys and Compounds*, 2022, **920**.

- [S7] S. T. Senthilkumar, N. Fu, Y. Liu, Y. Wang, L. Zhou, H. Huang, *Electrochimica Acta*, 2016, **211**, 411-419.
- [S8] H. Yang, H. Xu, M. Li, L. Zhang, Y. Huang, X. Hu, *ACS Appl Mater Interfaces*, 2016, **8**, 1774-1779.
- [S9] B. Patil, S. Ahn, C. Park, H. Song, Y. Jeong, H. Ahn, *Energy*, 2018, **142**, 608-616.
